# Supplementary material
Source: PubMed Central journal article supplement (PMC4408285)
Supplement: supp_WNL.0000000000001475_Figure_e-1.pdf [file supp_WNL.0000000000001475_Figure_e-1.pdf]

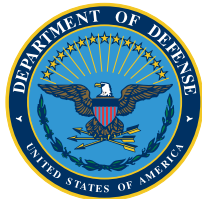

## Department of Defense **INSTRUCTION**

**NUMBER** 6490.11  
September 18, 2012

USD(P&R)

**mTBI/concussion.** The diagnosis of mild traumatic brain injury also known as concussion is made when two conditions are met. In the absence of documentation, both conditions are based on self-report information.

An injury event must have occurred.

The individual must have experienced a normal structural neuroimaging by head CT or conventional brain MRI and one of the following:

Alteration of consciousness lasting less than 24 hours.

Loss of consciousness, if any, lasting for less than 30 minutes.

Memory loss after the event, called post-traumatic amnesia, for events immediately surrounding the injury that lasts for less than 24 hours.
