# Supplementary material
Source: PubMed Central journal article supplement (PMC4408285)

# Sequential UPSIT Scores for Troops with Impaired Olfaction at Initial Testing Session Who Were Then Available for Follow-up Testing (N=7)

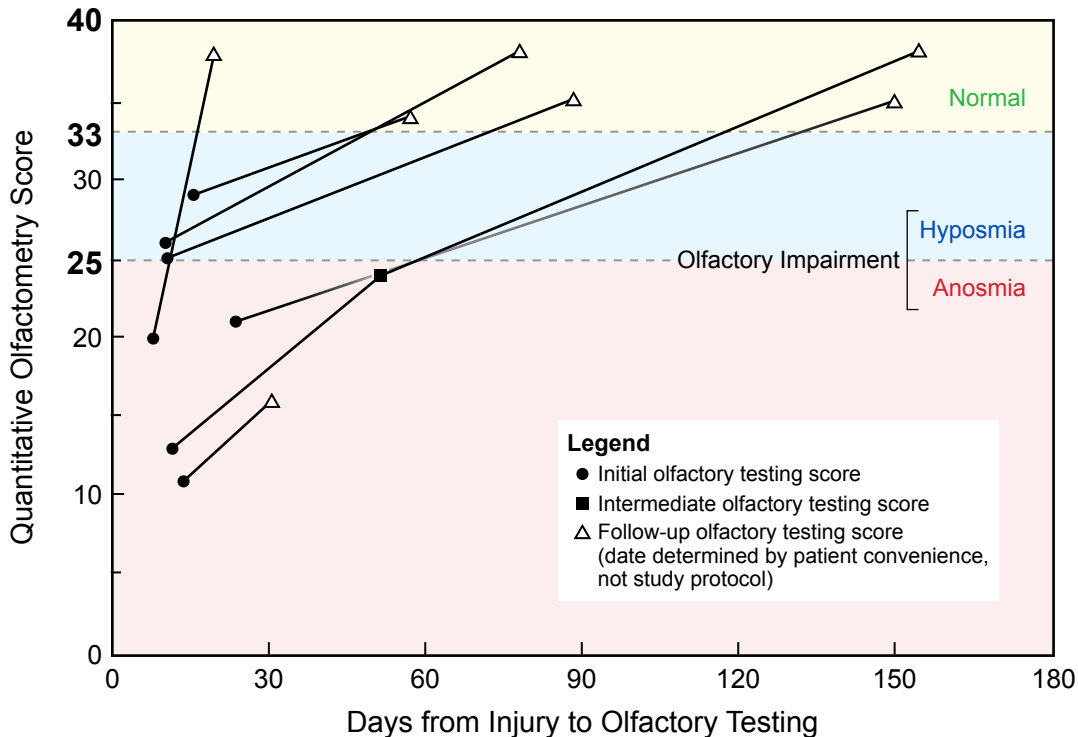

Supplement: supp_WNL.0000000000001475_Figure_e-2.pdf [file supp_WNL.0000000000001475_Figure_e-2.pdf]
